# Supplementary material for: Candida albicans Genes Modulating Echinocandin Susceptibility of Caspofungin-Adapted Mutants Are Constitutively Expressed in Clinical Isolates with Intermediate or Full Resistance to Echinocandins
Source: MDPI journal article supplement (doi:10.3390/jof10030224), 2024-03-19
Supplement: s1 [file s1]

## Supplemental Material

**Table S1.** List of primers used in qPCR

| Target gene                | Primer name and sequence                                                |
|----------------------------|-------------------------------------------------------------------------|
| <i>CHT2</i> (orf19.3895)   | CaCHT2 F, GTTACCCAATCTACCACCACTAC<br>CaCHT2 R, GGAGGAAGATGAAGTGACAATCT  |
| <i>URA7</i> (orf19.3941)   | CaURA7 F, AACTGGGAAGAGAATGGAGATG<br>CaURA7 R, CAAGGAATGGTCGTGATGGA      |
| <i>RPO26</i> (orf19.2643)  | CaRPO26 F, GGTGGATTTGGACCTGATGAT<br>CaRPO26 R, TGGTCATATACGGAGTGGTAGT   |
| <i>HAS1</i> (orf19.3962)   | CaHAS1 F, AGCCAAGGGTGTGAACTTATTA<br>CaHAS1 R, CGGCTTCATCAATCACCAAAG     |
| <i>DUS4</i> (orf19.966)    | CaDUS4 F, CTGCCAAAGACAAGTATGGAGA<br>CaDUS4 R, CGCTTCCACCACCTTATTGA      |
| <i>RPS25B</i> (orf19.6663) | CaRPS25B F, GGTGGTTCTTTAGCCAGAGTT<br>CaRPS25B R, GCACGAGTGTAGATAGCTTGTT |
| <i>UAP1</i> (orf19.4265)   | CaUAP1 F, ACCTAATGAACAAACAGCATCAAC<br>CaUAP1 R, CTTGACCTCCTGCCATCAATAA  |

|                           |                                                                               |
|---------------------------|-------------------------------------------------------------------------------|
| <i>CKS1</i> (orf19.1282)  | CaCKS1 F, CAGAAGAAGAATGGAGAGGGTTAG<br>CaCKS1 R, CCGGGATTTAAGGGTCTCTTG         |
| orf19.4149.1              | Ca19.4149.1 F, TCCAGCTTTCAGAGTTGAAGAA<br>Ca19.4149.1 R, TCTAGAAGCACCAGCAGAAAC |
| orf19.970                 | Ca19.970 F, TATCAGGTGCTTGGCTTTGG<br>Ca19.970 R, GGAAACCTCGGCATCAAGTAA         |
| <i>ECS1</i> (orf19.1766)  | CaECS1 F, GCAGTTGCTGGTAAAGTCATTG<br>CaECS1 R, GGCAAACCAACCTTGAGAATTT          |
| <i>ECS2</i> (orf19.6867)  | CaECS2 F, CTCGTTCCCAATTAGCCCAATA<br>CaECS2 R, AGGACCATAGCTGTTGGAATTAG         |
| <i>ECS3</i> (orf19.5833)  | CaECS3 F, TGTGTGGTGGAGACAGATTTAG<br>CaECS3 R, ATGGGTTTGCTCAGTGGTT             |
| <i>PR26</i> (orf19.5793)  | CaPR26 F, GAGGGCACAAGAAGAAGTCAA<br>CaPR26 R, CCAGTGGTGGATGAAACTATACC          |
| <i>LEU42</i> (orf19.1375) | CaLEU62 F, TTGAAATGGCCACTCCTAACA<br>CaLEU62 R, CAGCAACACTACACCCTCTATC         |

|                          |                                                                          |
|--------------------------|--------------------------------------------------------------------------|
| <i>FKS1</i> (orf19.2929) | CaFKS1 F, GGATATCAAGACCAAGCCAACTA<br><br>CaFKS1 R, CCAGGAGTTTGACCACCATAA |
| <i>FKS2</i> (orf19.3269) | CaFKS2 F, CTAGCAGTCGCCAATCATGTA<br><br>CaFKS2 R, CCGATAATGCAAACCCAAGAAC  |
| <i>FKS3</i> (orf19.2495) | CaFKS3 F, AGCTTGGTGCCCTGAAA<br><br>CaFKS3 R, GTTGCTGACATTATCGTCTTGG      |
| <i>ACT1</i> (orf19.5007) | CaACT1 F, ACTACCATGTTCCCAGGTATTG<br><br>CaACT1 R, CCACCAATCCAGACAGAGTATT |

### Supplemental figure legend

**Figure S1.** Patterns of relative gene expression in clinical isolates DPL253, DPL255, DPL258, DPL263 and DPL266 that are highly susceptible to echinocandins (see Table 2). Gene expressions were measured with qPCR, normalized against *ACT1* and compared to the corresponding genes of the reference strain SC5314 in which expressions were considered 100%. Shown is the average of three independent experiments  $\pm$  standard deviations. Note that *FKS3* was not detected in DPL263. The asterisks indicate *P* value of <0.05 (\*), <0.01 (\*\*) or <0.001 (\*\*\*), as determined using Student's *t* test. The graph was prepared using GraphPad Prism (9.5.0).

**Figure S2.** Patterns of relative gene expression in clinical isolates DPL225, DPL291 and DPL1000 that are less susceptible to echinocandins (see Table 2). The asterisks indicate *P* value of <0.05 (\*), <0.01 (\*\*) or <0.001 (\*\*\*), as determined using Student's *t* test. The graph was prepared using GraphPad Prism (9.5.0). For more details, see legend of Fig. S1.

**Figure S3.** Patterns of relative gene expression in clinically resistant isolates DPL15, DPL1009 and DPL1008 (see Table 2). The asterisks indicate *P* value of <0.05 (\*), <0.01 (\*\*) or <0.001 (\*\*\*), as determined using Student's *t* test. The graph was prepared using GraphPad Prism (9.5.0). For more details, see legend of Fig. S1.
